# Supplementary material for: Genome-wide identification and characterization of non-specific lipid transfer proteins in cabbage
Source: PeerJ. 2018 Aug 10;6:e5379. doi: 10.7717/peerj.5379 (PMC6089208; doi:10.7717/peerj.5379)
Supplement: Supplemental Information 7 [file peerj-06-5379-s007.xlsx]

## Sheet: Sheet1
Name	ID	Bud_FPKM	Callus_FPKM	Flower_FPKM	Leaf_FPKM	Root_FPKM	Silique_FPKM	Stem_FPKM
BoLTP1.1	Bol004980	541.586	0	0.200895	0	0	0	0
BoLTP1.2	Bol004981	0.834356	0.229402	0	0.206543	2.08212	0.205706	0.626516
BoLTP1.3	Bol007463	0	8.25846	0	0	22.0705	1.02853	0
BoLTP1.4	Bol010613	27.5338	76.3908	5.56324	103.891	0.208212	14.8108	15.6629
BoLTP1.5	Bol011263	902.204	15.5734	142.918	657.305	0.435015	783.351	37.3052
BoLTP1.6	Bol014755	6.25767	11.6995	0	243.514	0	6.99399	2.08839
BoLTP1.7	Bol014756	2833.09	0	3.98296	2.94188	1.48283	0	0
BoLTP1.8	Bol014771	16.4102	47.779	248.762	29.1652	0.629523	490.479	238.127
BoLTP1.9	Bol015488	3.51783	181.593	102.511	0.217707	0	3259.96	1051.99
BoLTP1.10	Bol017535	368.469	0	0.591592	0	0.298906	0	0
BoLTP1.11	Bol017820	3997.89	388.285	1363.58	16016	44.9322	3451.29	2820.79
BoLTP1.12	Bol024824	0	0	0	0	0	0	0
BoLTP1.13	Bol025300	2557.46	155.357	1709.44	214.539	5.82576	1751.66	1700.91
BoLTP1.14	Bol025301	993.513	147.305	1166.42	152.313	1.76562	1406.69	643.321
BoLTP1.15	Bol025304	5554.17	243.707	6184.54	875.345	12.526	7547.56	4024.46
BoLTP1.16	Bol025938	16.1387	13.42	2.52739	37.8073	0	30.4726	10.4436
BoLTP1.17	Bol028088	429.834	105.426	755.582	59.8694	0.658401	3190.79	2337.75
BoLTP1.18	Bol033811	1109.91	0	0.405166	0.609214	0.204713	0.202248	0
BoLTP1.19	Bol033888	2297.06	61.214	139.781	63.5934	2.99168	1631.32	92.1638
BoLTP2.1	Bol003276	42.2683	243.22	8.94707	21.4251	259.933	68.9771	124.942
BoLTP2.2	Bol003921	287.072	2.49031	0	0	1.00457	0	1.25949
BoLTP2.3	Bol021902	974.205	127.079	2764.72	1820.06	22.8694	2867.23	2565.58
BoLTP2.4	Bol022897	3.52236	258.715	0.24853	4.73344	36.918	4.46614	17.381
BoLTP2.5	Bol023407	0	0	0	0	0	219.309	0.747984
BoLTP2.6	Bol026234	0	0	0	0.73976	0	0	0
BoLTP2.7	Bol030927	6.03833	2.76701	1.98824	21.9233	24.612	8.43605	6.80125
BoLTP2.8	Bol039408	0.986057	0.271111	0	0	0.984277	0	0.246809
BoLTP2.9	Bol040181	4.26494	0	0	0	0	60.7531	0.237225
BoLTP2.10	Bol041153	0	0	0	0	0	81.1077	0.488683
BoLTP2.11	Bol043169	1.24515	4.38204	0.245994	0.246587	14.4176	16.9455	46.1257
BoLTP2.12	Bol045354	445.136	0	0.502237	0.251724	0	0	0
BoLTPc1	Bol028055	86.5265	0	0	0	0.246069	0	0
BoLTPd1	Bol003011	1.19632	8.68353	1.18173	28.9038	16.7182	2.59552	11.2589
BoLTPd2	Bol012977	0	0	0	0	0	0	0
BoLTPd3	Bol015654	0	9.25517	0	0.208323	3.15011	0.207479	0.210639
BoLTPd4	Bol017546	0	1.40035	0	1.47094	2.96567	3.7671	16.9977
BoLTPd5	Bol017728	0	4.39621	0.207822	0	0	2.90471	10.7426
BoLTPd6	Bol018048	0	0	0	0	0	0.218796	0
BoLTPd7	Bol018198	11.4466	46.7919	4.26679	150.553	23.4985	17.8909	13.6226
BoLTPd8	Bol018200	0.420774	0.925517	0	0.416646	0	0.207479	0.210639
BoLTPd9	Bol018201	0	0	0	0	0	0.606745	0
BoLTPd10	Bol022866	0	4.99961	0	0	1.43299	0.235956	0
BoLTPd11	Bol025257	0.210387	0.694138	0	0	0.210007	2.28227	30.1214
BoLTPd12	Bol027909	43.6784	52.1844	47.2379	125.274	0.487217	208.667	45.3187
BoLTPd13	Bol027910	0	0	0	0	0	0	0
BoLTPd14	Bol031417	5.85081	13.5348	6.4964	15.3213	0	67.8723	3.53628
BoLTPd15	Bol033097	47.6365	20.9042	21.094	661.298	4.45054	17.3564	43.4646
BoLTPd16	Bol038952	27.4461	310.26	7.47431	686.725	49.475	79.8695	77.7735
BoLTPd17	Bol038953	37.7822	469.945	9.4755	889.22	85.9346	120.198	142.753
BoLTPd18	Bol041684	15.4918	31.041	28.3	70.6052	107.611	115.734	180.388
BoLTPe1	Bol005017	1.20024	0	0	0	0	0	0
BoLTPe2	Bol025022	14.0874	0	0	0	0.594167	0	0
BoLTPg1	Bol002099	23.1534	11.4242	8.40668	32.0967	0.49971	9.38018	7.6435
BoLTPg2	Bol002882	115.102	0	1.39081	0	0.351358	0	0
BoLTPg3	Bol005508	56.9448	0	0.118173	0	0	0	0
BoLTPg4	Bol008439	32.7431	11.3625	18.3398	119.697	0.711528	16.0842	10.0929
BoLTPg5	Bol009169	153.202	26.6995	137.071	27.455	1.14789	47.5051	41.8323
BoLTPg6	Bol009444	0.640129	0.176	0.553284	0.0792311	0	0	0
BoLTPg7	Bol009733	118.259	0	1.07144	0	0	0	0
BoLTPg8	Bol009734	1.84188	0	0	0	0	0	0
BoLTPg9	Bol009735	75.1032	0	0.263469	0	0	0	0
BoLTPg10	Bol010646	0	0	0	0	0	0	0
BoLTPg11	Bol010977	30.2621	140.284	97.5545	58.8027	26.9593	48.7769	37.3028
BoLTPg12	Bol011992	2.41211	4.6814	0.981114	0.983479	3.68245	5.17732	0.426177
BoLTPg13	Bol013223	152.947	0	2.32855	0.137304	0	0	0
BoLTPg14	Bol015702	29.6345	0	0.114797	0	0	0	0
BoLTPg15	Bol018303	13.3334	0	17.6395	0	0	0	0
BoLTPg16	Bol020764	208.662	24.4542	8.43758	2.81931	2.57142	14.708	12.2171
BoLTPg17	Bol024602	29.6245	9.30867	39.1571	0.27937	1.54896	312.6	4.51961
BoLTPg18	Bol026256	0	0	0	0	0	0.851949	0
BoLTPg19	Bol026257	0.353694	8.75217	0	0	143.87	10.9874	5.13471
BoLTPg20	Bol026547	0.353694	8.75217	0	0	143.87	10.9874	5.13471
BoLTPg21	Bol030775	0.129127	0	0	0	0.128893	0.127342	0
BoLTPg22	Bol030789	239.869	0	2.13104	0.133511	0	0.13297	0
BoLTPg23	Bol039422	0	0	0	0	0.163496	0	0.491962
BoLTPg24	Bol040003	0	0	0.160716	0	0	79.9043	0.162894
BoLTPg25	Bol040990	0	0.265743	0.35803	0	0.120598	9.53171	0
BoLTPg26	Bol041658	0.604082	0	0	0	0	0	0
BoLTPg27	Bol041803	41.0899	21.9102	1.47596	6.04137	1.61577	3.43822	26.4288
BoLTPg28	Bol042588	1.11565	3.83429	0.688782	1.65706	6.82104	2.61305	25.97
BoLTPx1	Bol010647	0	0	0	0	0.194887	0	0
BoLTPx2	Bol014710	21.3026	0	0	0	0	0.203962	0
BoLTPx3	Bol019670	0	0	0	0	0	4.40674	0
BoLTPx4	Bol021025	0.966531	0	1.67081	0	0	0	0.483844
BoLTPx5	Bol021026	4.98595	0	0.777657	0	0	0	0
BoLTPx6	Bol033092	0	0	0	0	0	2.92996	0
BoLTPx7	Bol043398	0	0	0	0	0	0	0
BoLTPx8	Bol043752	0	0	0	0	0	0	0
BoLTPx9	Bol044131	0	0	0	0	0	0	0
